# Supplementary material for: Riboflavin Targets the Cellular Metabolic and Ribosomal Pathways of Candida albicans In Vitro and Exhibits Efficacy against Oropharyngeal Candidiasis
Source: PubMed Central journal article supplement (PMC9927497; doi:10.1128/spectrum.03801-22), 2023-01-10
Supplement: spectrum.03801-22-s0001.pdf [file spectrum.03801-22-s0001.pdf]

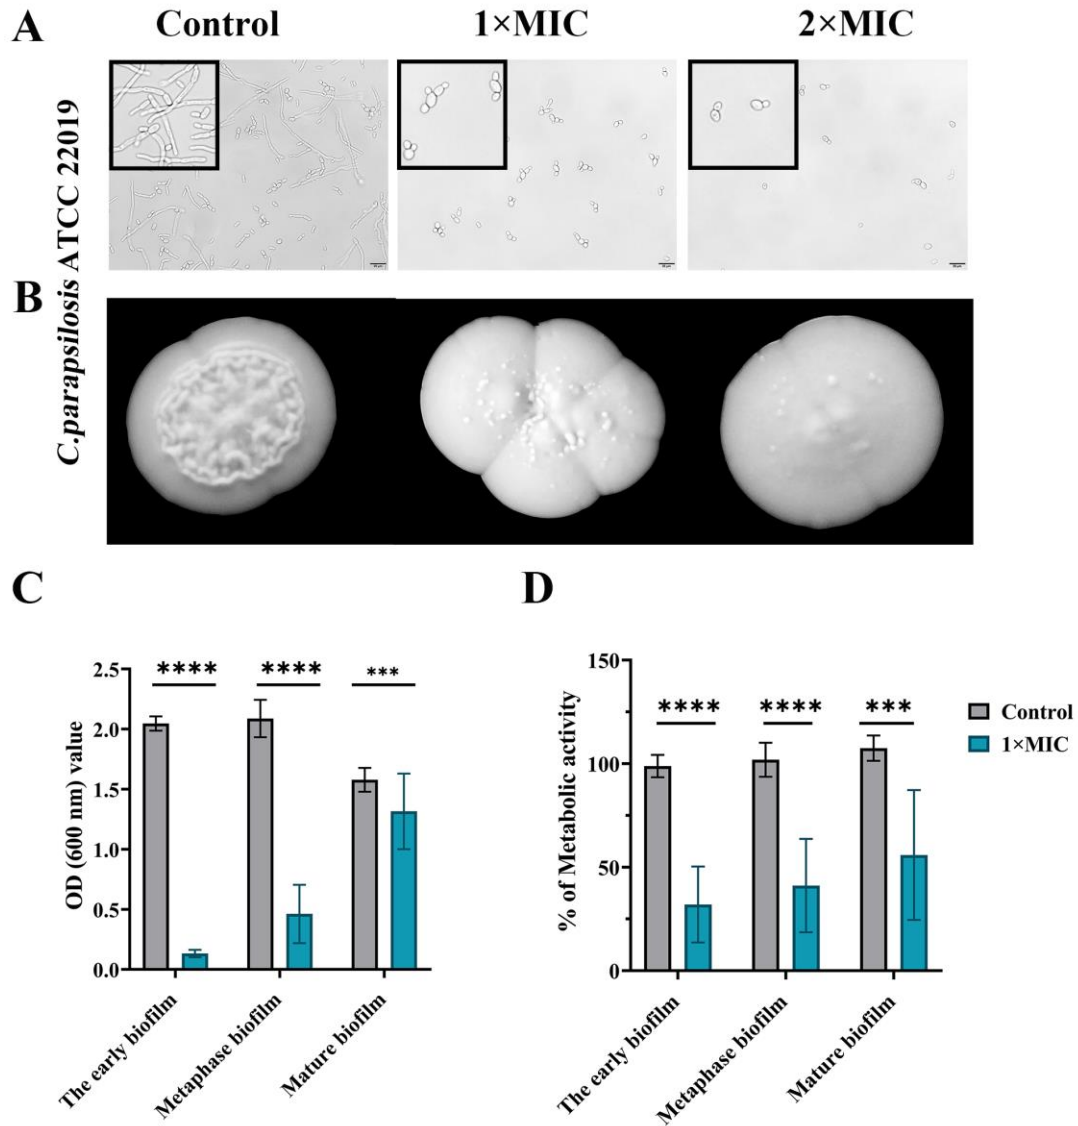

FIG S1 The effect of RF on *C. parapsilosis* hyphal and biofilm formation. (A) Hyphae formation was evaluated in a 1640 RPMI + 10 % (v/v) FBS liquid medium and the uniformly enlarged image is presented in the black boxes on the left hand. Scale bar: 20  $\mu$ m. (B) Hyphae formation was evaluated on YPD+10 % (v/v) FBS agar plates. (C) The biomass of *C. albicans* biofilm was observed by a crystal violet (CV) assay. (D) Metabolic activity of *C. albicans* biofilm was determined by 2,3-bis-(2-methoxy-4-nitro-5-sulphophenyl)-2H-tetrazolium-5-carboxanilide (XTT) assay and the results are presented as relative percentages. Data were analyzed by t test (ns  $P > 0.05$ , \*  $P < 0.05$ , \*\*  $P < 0.01$ , \*\*\*  $P < 0.001$ , \*\*\*\*  $P < 0.0001$ ).

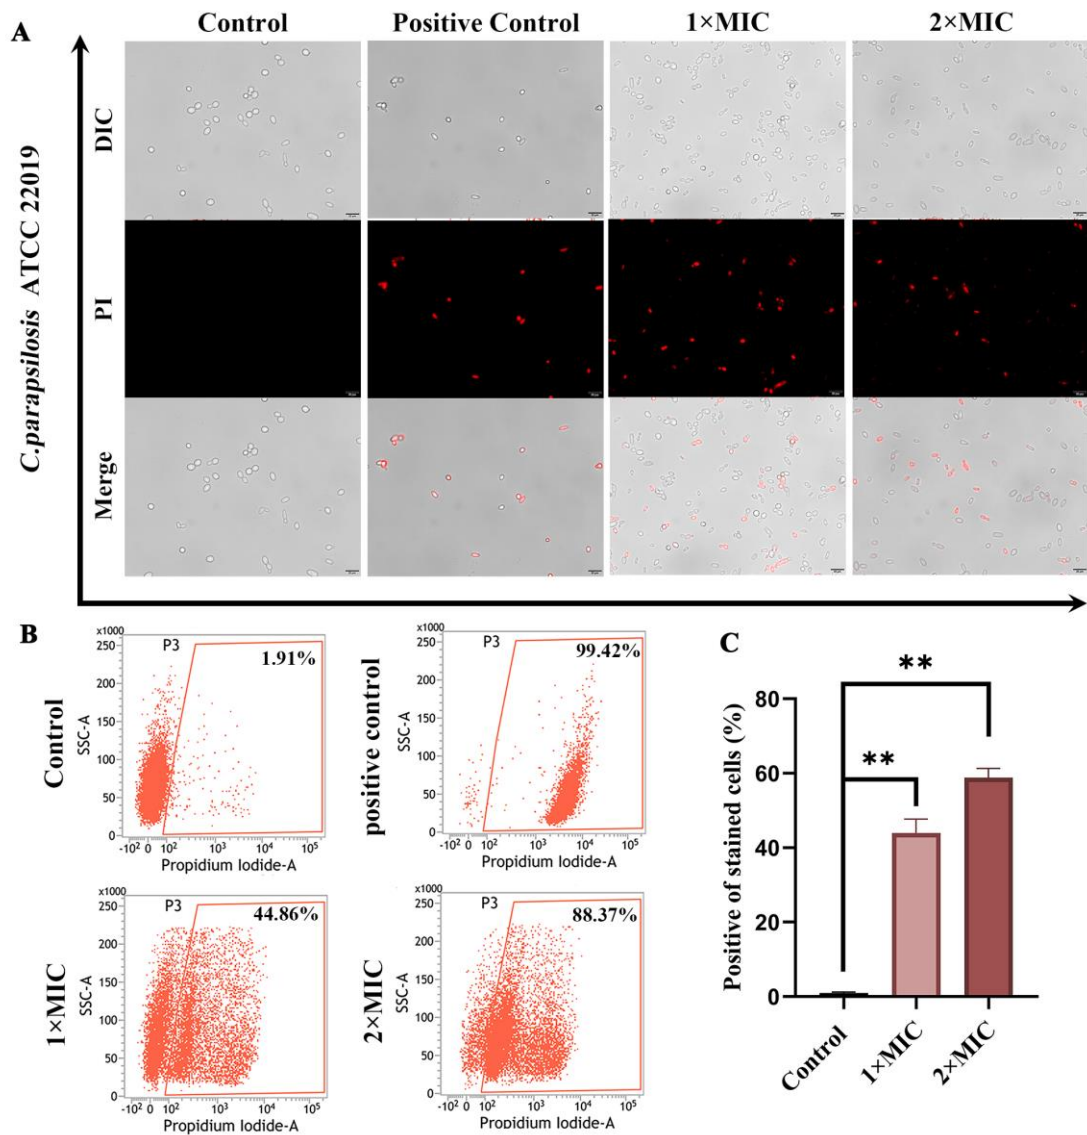

FIG S2 The effect of RF on *C. parapsilosis* cell membrane. *C. parapsilosis* cells with or without RF treatment were stained with propidium iodide (PI) and analyzed by (A) fluorescence microscopy and (B) flow cytometry. Scale bar: 20  $\mu\text{m}$ . (C) Histogram analysis shows the percentage of PI-positive cells. Data were analyzed by ANOVA (ns  $P > 0.05$ , \*  $P < 0.05$ , \*\*  $P < 0.01$ , \*\*\*  $P < 0.001$ , \*\*\*\*  $P < 0.0001$ ).

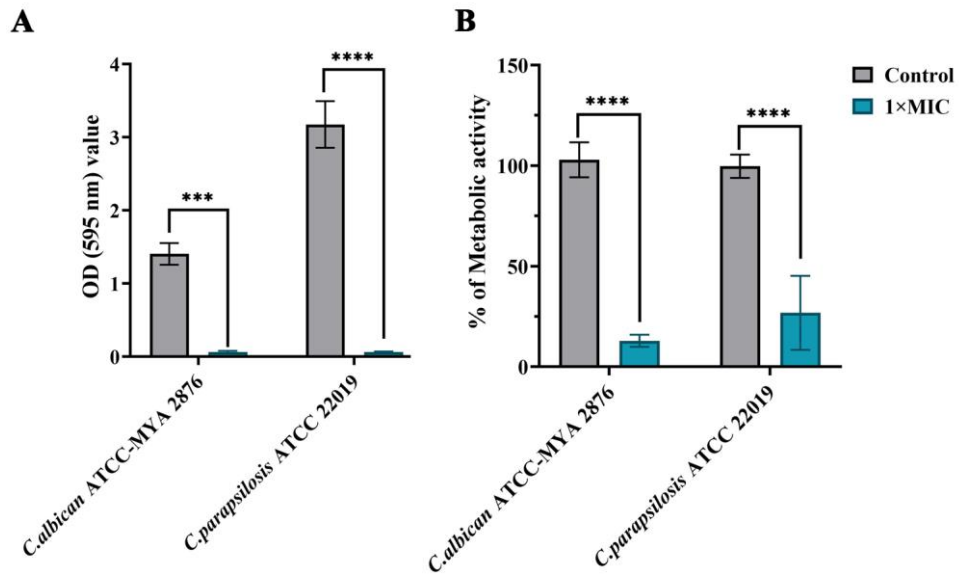

FIG S3 The effect of RF on adhesion. The adhesion of *C. albicans* and *C. parapsilosis* were examined by (A) CV assay and (B) XTT assay. Data were analyzed by t test (ns  $P > 0.05$ , \*  $P < 0.05$ , \*\*  $P < 0.01$ , \*\*\*  $P < 0.001$ , \*\*\*\*  $P < 0.0001$ ).

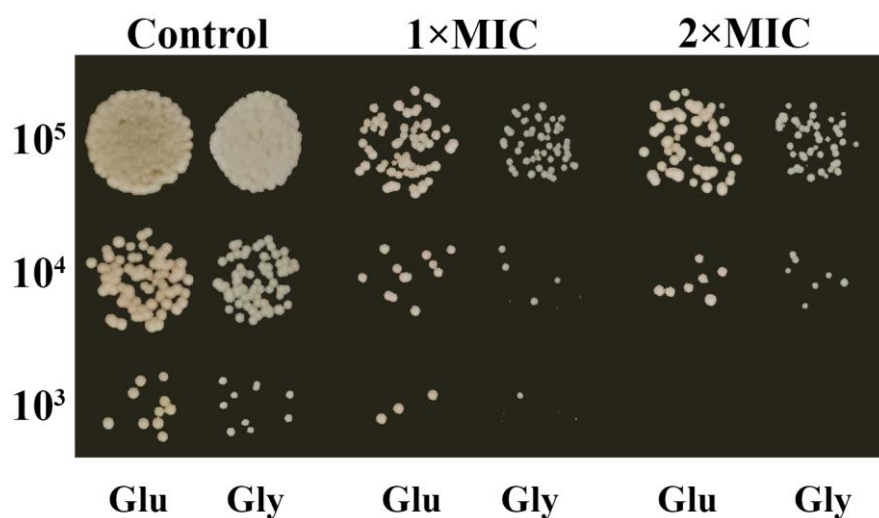

FIG S4 Effects of RF on glucose (Glu) and glycerol (Gly) utilization in *C. albicans*. Strains with defective respiratory function are unable to utilize non-fermentative carbon sources (glycerol).

TABLE S1 Primers sequence of target genes

| Gene           | Sequence (5'-3')          |
|----------------|---------------------------|
| <i>ACT1-F</i>  | CCAGGTATTGCTGAACGTATGC    |
| <i>ACT1-R</i>  | ACTCTGTCTGGATTGGTGGTTC    |
| <i>HWP1-F</i>  | TCTCTACGACTGAAGGTGCTATTC  |
| <i>HWP1-R</i>  | GACTTTCGGTGCTGCTATTATTGG  |
| <i>ALS3-F</i>  | CCTATACCACTGCTACTACCGTT   |
| <i>ALS3-R</i>  | CGTCCTCATTACACCAACCATAAC  |
| <i>BCR1-F</i>  | TACACCTAAAAGAAGACCCGAACC  |
| <i>BCR1-R</i>  | ACCAACACCAATATGAACACGG    |
| <i>NDT80-F</i> | AATCTACCCTGCAGTTCCTTCAG   |
| <i>NDT80-R</i> | AGGGGAAACTACTACCAAGAGTAC  |
| <i>ERG11-F</i> | TGGAGACGTGATGCTGCTCA      |
| <i>ERG11-R</i> | ACGTGGTGATATTGATCCAAATCGT |
| <i>ECE1-F</i>  | CCAGAAATTGTTGCTCGTGTTG    |
| <i>ECE1-R</i>  | CTTGTTGAACAGTTTCCAGGACG   |
| <i>CDA2-F</i>  | GTGGCGGCAGTGGATTAC        |
| <i>CDA2-R</i>  | AGGTGGATCTAAATCTGGCCATT   |
| <i>ERG2-F</i>  | GCCACGGCCATTATGATTGA      |
| <i>ERG2-R</i>  | AGTCCCAATTGCTGTACCGA      |
| <i>ERG11-F</i> | TGGAGACGTGATGCTGCTCA      |
| <i>ERG11-R</i> | ACGATTTGGATCAATATCACCACGT |
| <i>RIB4-F</i>  | TGGTATTCTTCATGCCAGATGGA   |
| <i>RIB4-R</i>  | AGGTAAACCATTAGACGCCA      |
| <i>RIB5-F</i>  | ACTCTCCGCAGAACCAATCT      |
| <i>RIB5-R</i>  | TGGCCACCCAATCTAACTTCA     |

---

|                 |                       |
|-----------------|-----------------------|
| <i>THI4-F</i>   | GCCACTGCCGTTGAAGATTT  |
| <i>THI4-R</i>   | CTTCTGGTCACGATGGACCT  |
| <i>THI13-F</i>  | GAGCCCTCCAATCCATCTGA  |
| <i>THI13-R</i>  | TGGGAGTCCTCTAGCTTTGG  |
| <i>PGM2-F</i>   | ACCAGGAGATTCCGTTGCTA  |
| <i>PGM2-R</i>   | TCCAACCAGTAGGAACTTCA  |
| <i>TPH1-F</i>   | ACCAAGTTTGCCTTGGACAC  |
| <i>TPH1-R</i>   | GGGTAGCGGCTAAACCAGTA  |
| <i>RHR2-F</i>   | GGATACCATGACGCCCACTA  |
| <i>RHR2-R</i>   | GCACCTTTACCTGCGGTTAT  |
| <i>MLS1-F</i>   | AGAAACAGAGCTGCTTTGGC  |
| <i>MLS1-R</i>   | TGGTTCCTTTGGTGGCAATG  |
| <i>PCK1-F</i>   | CTTGGTGTGACCCCAATGA   |
| <i>PCK1-R</i>   | AGAACCAACCAACCAGTGT   |
| <i>FDH1-F</i>   | AGAGGTATCGCTGCCATTGA  |
| <i>FDH1-R</i>   | AACAGCAGCAACATCCCAAG  |
| <i>ADH2-F</i>   | TTAGAAGCCGGTCAATGGGT  |
| <i>ADH2-R</i>   | CATGGCCTTGGCGTATTGAA  |
| <i>RPL3-F</i>   | ACGTCACGGTTCCTTAGGTT  |
| <i>RPL3-R</i>   | AAGGCAGTCAAAGCAACTGG  |
| <i>RPL4B-F</i>  | AAGGCAGTCAAAGCAACTGG  |
| <i>RPL4B-R</i>  | GCTTGTTCAACCTTGGCAGA  |
| <i>RPL10-F</i>  | AGGTATGAGAGGTGCTTGGG  |
| <i>RPL10-R</i>  | TTGTTGACCTGGGAACTTGT  |
| <i>RPL17B-F</i> | CCTGCTAACCCAGCCAAATC  |
| <i>RPL17B-R</i> | TGGCTTGAGCAGTTTCTCTG  |
| <i>RPP1A-F</i>  | TCAACTTCTCTGCTGCTCCA  |
| <i>RPP1A-R</i>  | TTCTTCAGCAGCTTCTTCGG  |
| <i>YST1-F</i>   | CCCAAGAACCGATGCTCAAG  |
| <i>YST1-R</i>   | TCTCTAGCAAGCAACCACCA  |
| <i>RPS14B-F</i> | TTGCCAGAGTTACTGGTGGT  |
| <i>RPS14B-R</i> | AGCTCTTAAAGCGGATTGACC |
| <i>ASC1-F</i>   | CGCTGACTTCATTGGTCACA  |
| <i>ASC1-R</i>   | AAGCATGAACTTCGGCCTTG  |

---
